# Supplementary material
Source: publisher site journal article supplement (https://www.dovepress.com/get_supplementary_file.php?f=393582.docx)
Supplement: Supplementary file 1 [file get_supplementary_file.php]

**Supplementary tables**

**Table S1** Top 20 corresponding author's countries with the most publications in TRPM8 research.

| **Rank** | **Country** | **Articles** |  | **Rank** | **Country** | **Articles** |
| --- | --- | --- | --- | --- | --- | --- |
| 1 | USA | 267 |  | 11 | BELGIUM | 20 |
| 2 | JAPAN | 132 |  | 12 | BRAZIL | 20 |
| 3 | CHINA | 124 |  | 13 | CHILE | 19 |
| 4 | GERMANY | 81 |  | 14 | CANADA | 18 |
| 5 | ENGLAND | 61 |  | 15 | INDIA | 14 |
| 6 | ITALY | 50 |  | 16 | RUSSIA | 14 |
| 7 | FRANCE | 34 |  | 17 | TURKEY | 11 |
| 8 | SOUTH KOREA | 34 |  | 18 | DENMARK | 9 |
| 9 | SPAIN | 33 |  | 19 | ROMANIA | 9 |
| 10 | AUSTRALIA | 20 |  | 20 | IRELAND | 8 |

**Table S2** Top 20 international collaborations in TRPM8 research.

| **Rank** | **From** | **To** | **Freq** |  | **Rank** | **From** | **To** | **Freq** |
| --- | --- | --- | --- | --- | --- | --- | --- | --- |
| 1 | USA | CHINA | 31 |  | 11 | GERMANY | AUSTRALIA | 8 |
| 2 | USA | GERMANY | 19 |  | 12 | GERMANY | ENGLAND | 8 |
| 3 | USA | ENGLAND | 16 |  | 13 | USA | SOUTH KOREA | 8 |
| 4 | USA | JAPAN | 14 |  | 14 | FRANCE | IRELAND | 7 |
| 5 | USA | CANADA | 12 |  | 15 | SPAIN | CHILE | 7 |
| 6 | ITALY | SPAIN | 10 |  | 16 | ENGLAND | SPAIN | 7 |
| 7 | USA | FRANCE | 10 |  | 17 | USA | AUSTRALIA | 7 |
| 8 | FRANCE | UKRAINE | 9 |  | 18 | USA | NETHERLANDS | 7 |
| 9 | USA | SPAIN | 9 |  | 19 | ENGLAND | AUSTRALIA | 6 |
| 10 | CHINA | GERMANY | 8 |  | 20 | ENGLAND | NETHERLANDS | 6 |

**Table S3** Top 20 articles with the most global citations.

| **Rank** | **Article** | **DOI** | **Total Citations** | **TC per Year** | **Normalized TC** |
| --- | --- | --- | --- | --- | --- |
| 1 | STORY GM, 2003, CELL | 10.1016/S0092-8674(03)00158-2 | 1759 | 87.95 | 3.27 |
| 2 | PEIER AM, 2002, CELL | 10.1016/S0092-8674(02)00652-9 | 1507 | 71.76 | 1.61 |
| 3 | BANDELL M, 2004, NEURON | 10.1016/S0896-6273(04)00150-3 | 1307 | 68.79 | 4.48 |
| 4 | BAUTISTA DM, 2007, NATURE | 10.1038/nature05910 | 815 | 50.94 | 6.24 |
| 5 | VOETS T, 2004, NATURE | 10.1038/nature02732 | 716 | 37.68 | 2.45 |
| 6 | GULER AD, 2002, J NEUROSCI | 10.1523/JNEUROSCI.22-15-06408.2002 | 691 | 32.90 | 0.74 |
| 7 | XU HX, 2002, NATURE | 10.1038/nature00882 | 605 | 28.81 | 0.65 |
| 8 | DHAKA A, 2007, NEURON | 10.1016/j.neuron.2007.02.024 | 579 | 36.19 | 4.44 |
| 9 | KOBAYASHI K, 2005, J COMP NEUROL | 10.1002/cne.20794 | 553 | 30.72 | 3.28 |
| 10 | COLBURN RW, 2007, NEURON | 10.1016/j.neuron.2007.04.017 | 522 | 32.63 | 4.00 |
| 11 | DE PETROCELLIS L, 2011, BRIT J PHARMACOL | 10.1111/j.1476-5381.2010.01166.x | 481 | 40.08 | 7.75 |
| 12 | OBATA K, 2005, J CLIN INVEST | 10.1172/JCI23437 | 461 | 25.61 | 2.73 |
| 13 | ROHACS T, 2005, NAT NEUROSCI | 10.1038/nn1451 | 432 | 24.00 | 2.56 |
| 14 | HU HZ, 2004, J BIOL CHEM | 10.1074/jbc.M404164200 | 367 | 19.32 | 1.26 |
| 15 | KARASHIMA Y, 2007, J NEUROSCI | 10.1523/JNEUROSCI.2221-07.2007 | 363 | 22.69 | 2.78 |
| 16 | TOMINAGA M, 2004, J NEUROBIOL | 10.1002/neu.20079 | 347 | 18.26 | 1.19 |
| 17 | BEHRENDT HJ, 2004, BRIT J PHARMACOL | 10.1038/sj.bjp.0705652 | 335 | 17.63 | 1.15 |
| 18 | MACPHERSON LJ, 2006, MOL CELL NEUROSCI | 10.1016/j.mcn.2006.05.005 | 296 | 17.41 | 2.69 |
| 19 | PROUDFOOT CJ, 2006, CURR BIOL | 10.1016/j.cub.2006.07.061 | 292 | 17.18 | 2.65 |
| 20 | CHASMAN DI, 2011, NAT GENET | 10.1038/ng.856 | 271 | 22.58 | 4.36 |

**Table S4** Top 20 articles with the most local citations.

| **Rank** | **Article** | **DOI** | **Local Citations** | **LC/GC Ratio (%)** | **Normalized Local Citations** |
| --- | --- | --- | --- | --- | --- |
| 1 | PEIER AM, 2002, CELL | 10.1016/S0092-8674(02)00652-9 | 521 | 34.57 | 2.6 |
| 2 | BAUTISTA DM, 2007, NATURE | 10.1038/nature05910 | 277 | 33.99 | 7.52 |
| 3 | STORY GM, 2003, CELL | 10.1016/S0092-8674(03)00158-2 | 257 | 14.61 | 2.75 |
| 4 | DHAKA A, 2007, NEURON | 10.1016/j.neuron.2007.02.024 | 230 | 39.72 | 6.25 |
| 5 | COLBURN RW, 2007, NEURON | 10.1016/j.neuron.2007.04.017 | 223 | 42.72 | 6.06 |
| 6 | VOETS T, 2004, NATURE | 10.1038/nature02732 | 149 | 20.81 | 2.32 |
| 7 | BEHRENDT HJ, 2004, BRIT J PHARMACOL | 10.1038/sj.bjp.0705652 | 130 | 38.81 | 2.02 |
| 8 | ROHACS T, 2005, NAT NEUROSCI | 10.1038/nn1451 | 128 | 29.63 | 2.79 |
| 9 | BANDELL M, 2004, NEURON | 10.1016/S0896-6273(04)00150-3 | 121 | 9.26 | 1.88 |
| 10 | KOBAYASHI K, 2005, J COMP NEUROL | 10.1002/cne.20794 | 115 | 20.8 | 2.5 |
| 11 | PROUDFOOT CJ, 2006, CURR BIOL | 10.1016/j.cub.2006.07.061 | 107 | 36.64 | 4.42 |
| 12 | CHUANG HH, 2004, NEURON | 10.1016/j.neuron.2004.08.038 | 107 | 46.32 | 1.66 |
| 13 | KARASHIMA Y, 2007, J NEUROSCI | 10.1523/JNEUROSCI.2221-07.2007 | 94 | 25.9 | 2.55 |
| 14 | BANDELL M, 2006, NAT NEUROSCI | 10.1038/nn1665 | 88 | 46.32 | 3.63 |
| 15 | ZHANG L, 2004, CANCER RES | 10.1158/0008-5472.CAN-04-2146 | 87 | 37.34 | 1.35 |
| 16 | LIU BY, 2005, J NEUROSCI | 10.1523/JNEUROSCI.3632-04.2005 | 86 | 37.39 | 1.87 |
| 17 | DHAKA A, 2008, J NEUROSCI | 10.1523/JNEUROSCI.3976-07.2008 | 83 | 38.79 | 4.18 |
| 18 | BRAUCHI S, 2004, P NATL ACAD SCI USA | 10.1073/pnas.0406773101 | 77 | 30.2 | 1.2 |
| 19 | MACPHERSON LJ, 2006, MOL CELL NEUROSCI | 10.1016/j.mcn.2006.05.005 | 73 | 24.66 | 3.02 |
| 20 | MADRID R, 2006, J NEUROSCI | 10.1523/JNEUROSCI.3752-06.2006 | 73 | 52.52 | 3.02 |

**Table S5** Top 20 author keywords with the most occurrences or total link strength.

|  | **Occurrences** |  |  |  | **Total link strength** |  |
| --- | --- | --- | --- | --- | --- | --- |
| **Rank** | **Author Keyword** | **Freq** |  | **Rank** | **Author Keyword** | **Strength** |
| 1 | trpm8 | 353 |  | 1 | trpm8 | 1159 |
| 2 | neurosciences & neurology | 206 |  | 2 | neurosciences & neurology | 675 |
| 3 | trp channel | 185 |  | 3 | trp channel | 618 |
| 4 | pharmacology & pharmacy | 136 |  | 4 | menthol | 493 |
| 5 | menthol | 126 |  | 5 | pharmacology & pharmacy | 395 |
| 6 | biochemistry & molecular biology | 115 |  | 6 | biochemistry & molecular biology | 375 |
| 7 | cell biology | 79 |  | 7 | trpa1 | 347 |
| 8 | trpa1 | 79 |  | 8 | pain | 310 |
| 9 | pain | 75 |  | 9 | trpv1 | 271 |
| 10 | physiology | 75 |  | 10 | cell biology | 256 |
| 11 | trpv1 | 66 |  | 11 | physiology | 249 |
| 12 | chemistry | 46 |  | 12 | cold | 177 |
| 13 | cold | 39 |  | 13 | dorsal root ganglion | 159 |
| 14 | oncology | 39 |  | 14 | chemistry | 150 |
| 15 | dorsal root ganglion | 36 |  | 15 | capsaicin | 133 |
| 16 | calcium | 30 |  | 16 | ion channels | 113 |
| 17 | icilin | 27 |  | 17 | oncology | 106 |
| 18 | ion channels | 27 |  | 18 | calcium | 104 |
| 19 | capsaicin | 26 |  | 19 | icilin | 97 |
| 20 | research & experimental medicine | 25 |  | 20 | anesthesiology | 93 |
